# Supplementary material for: Diverging effects of isotopic fractionation upon molecular diffusion of noble gases in water: mechanistic insights through ab initio molecular dynamics simulations
Source: Royal Society of Chemistry journal article supplement (doi:10.1039/c6em00614k), 2017-01-01
Supplement: c6em00614k1.pdf [file c6em00614k1.pdf]

*Supporting Information*

Diverging effects of isotopic fractionation upon molecular diffusion of noble gases in water: mechanistic insights through *ab initio* molecular dynamics simulations

Halua Pinto de Magalhães,<sup>a</sup> Matthias S. Brennwald,<sup>a</sup> Rolf Kipfer<sup>a,b,c</sup>

<sup>a</sup> *Eawag, Swiss Federal Institute of Aquatic Science and Technology, 8600 Duebendorf, Switzerland*

<sup>b</sup> *ETH Zurich, Institute of Biogeochemistry and Pollution Dynamics, 8092 Zurich, Switzerland*

<sup>c</sup> *ETH Zurich, Institute of Geochemistry and Petrology, 8092 Zurich, Switzerland*

Contents

|     |                                                          |   |
|-----|----------------------------------------------------------|---|
| 1   | Additional plots                                         | 1 |
| 1.1 | Oxygen-oxygen radial distribution functions . . . . .    | 1 |
| 1.2 | Water mean-squared displacement . . . . .                | 1 |
| 2   | Details of Symmetry Adapted Perturbation Theory analysis | 2 |
| 2.1 | Ne-H <sub>2</sub> O dimers . . . . .                     | 2 |
| 2.2 | Ar-H <sub>2</sub> O dimers . . . . .                     | 3 |
| 2.3 | Kr-H <sub>2</sub> O dimers . . . . .                     | 4 |

## 1 Additional plots

### 1.1 Oxygen-oxygen radial distribution functions

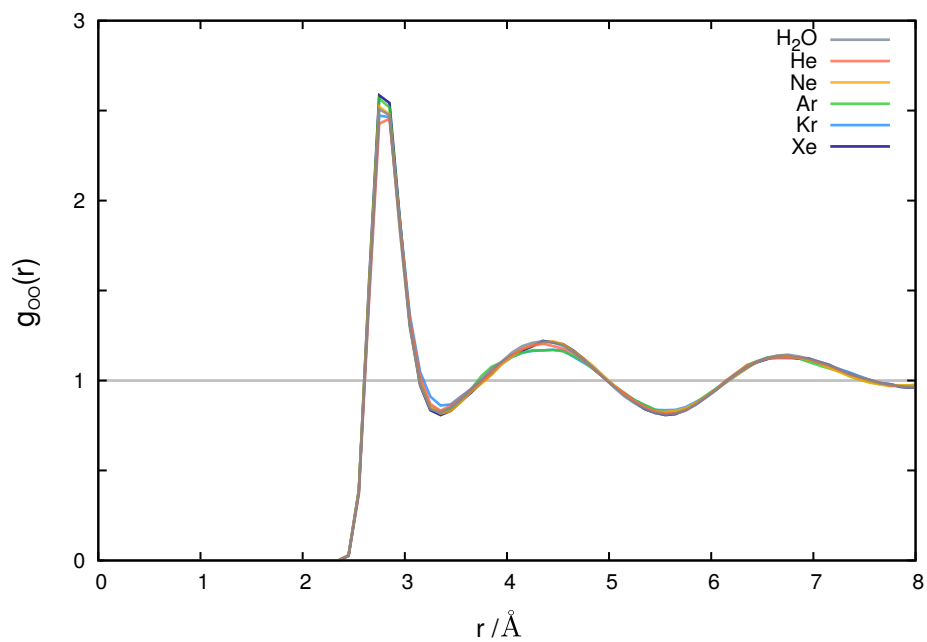

Figure 1: Radial distribution functions of oxygen-oxygen distances for the pure water reference as well as all noble gas containing systems.

### 1.2 Water mean-squared displacement

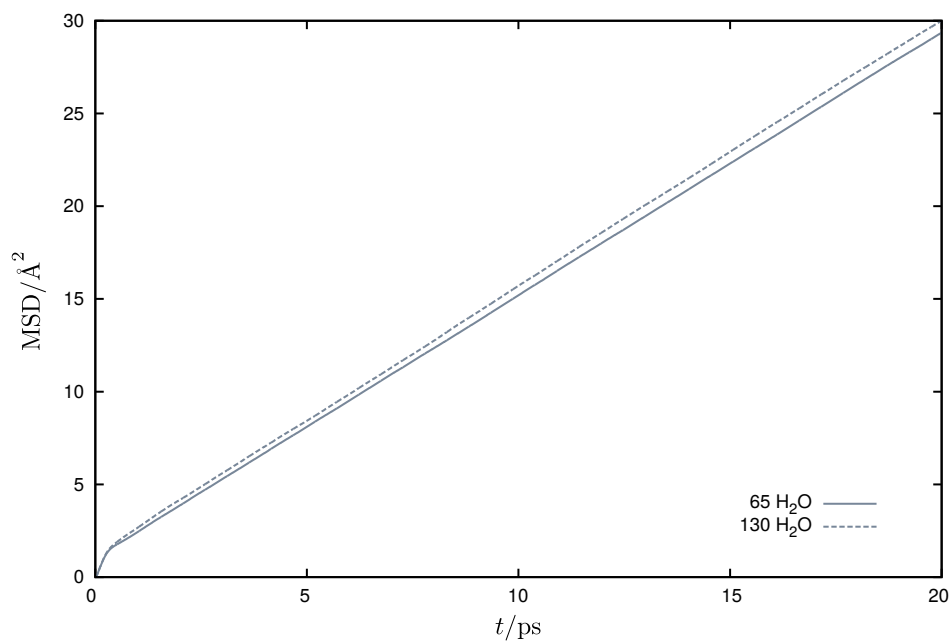

Figure 2: Mean-square displacement (of oxygen atoms) of the pure liquid water with 65 and 130 molecules.

## 2 Details of Symmetry Adapted Perturbation Theory analysis

### 2.1 Ne-H<sub>2</sub>O dimers

|            | Snapshot        | 1       | 2       | 3       | 4       | 5       |
|------------|-----------------|---------|---------|---------|---------|---------|
| Fragment 1 | Total SAPT      | 0.3642  | 0.0157  | 0.2587  | 1.4557  | -0.1463 |
|            | Electrostatics  | -0.4213 | -0.1477 | -0.3497 | -1.1028 | -0.0548 |
|            | Exchange        | 1.2731  | 0.4614  | 1.1514  | 3.4480  | 0.2159  |
|            | Induction       | 0.0334  | -0.0087 | 0.0150  | 0.0983  | -0.0377 |
|            | Dispersion      | -0.5210 | -0.2893 | -0.5580 | -0.9877 | -0.2548 |
|            | Charge Transfer | 0.0076  | 0.0023  | -0.0124 | -0.0424 | -0.0056 |
| Fragment 2 | Total SAPT      | 0.2143  | -0.0687 | 0.6853  | 0.0591  | -0.1337 |
|            | Electrostatics  | -0.3397 | -0.1082 | -0.6332 | -0.2286 | -0.0775 |
|            | Exchange        | 1.1019  | 0.3801  | 2.0433  | 0.7821  | 0.2962  |
|            | Induction       | -0.0132 | -0.0249 | 0.0342  | -0.0154 | -0.0518 |
|            | Dispersion      | -0.5347 | -0.3157 | -0.7590 | -0.4790 | -0.3005 |
|            | Charge Transfer | -0.0141 | -0.0055 | -0.0324 | -0.0114 | -0.0104 |
| Fragment 3 | Total SAPT      | 0.2000  | 0.5339  | -0.0005 |         |         |
|            | Electrostatics  | -0.3103 | -0.5337 | -0.1348 |         |         |
|            | Exchange        | 1.0393  | 1.7851  | 0.4225  |         |         |
|            | Induction       | -0.0187 | -0.0081 | -0.0100 |         |         |
|            | Dispersion      | -0.5103 | -0.7093 | -0.2782 |         |         |
|            | Charge Transfer | -0.0091 | -0.0327 | -0.0004 |         |         |
| Fragment 4 | Total SAPT      |         | -0.0724 |         |         |         |
|            | Electrostatics  |         | -0.0823 |         |         |         |
|            | Exchange        |         | 0.2840  |         |         |         |
|            | Induction       |         | -0.0283 |         |         |         |
|            | Dispersion      |         | -0.2458 |         |         |         |
|            | Charge Transfer |         | -0.0077 |         |         |         |
| Average    | Total SAPT      | 0.2595  | 0.1021  | 0.3145  | 0.7574  | -0.1400 |
|            | Electrostatics  | -0.3571 | -0.2180 | -0.3726 | -0.6657 | -0.0662 |
|            | Exchange        | 1.1381  | 0.7276  | 1.2058  | 2.1151  | 0.2560  |
|            | Induction       | 0.0005  | -0.0175 | 0.0131  | 0.0414  | -0.0448 |
|            | Dispersion      | -0.5220 | -0.3900 | -0.5318 | -0.7334 | -0.2777 |
|            | Charge Transfer | -0.0052 | -0.0109 | -0.0151 | -0.0269 | -0.0080 |

Table 1: Pair-wise intermolecular interactions and their components of the Ne with an individual next-neighboring water molecule from the first solvent shell. The values were obtained by SAPT2+3(CCD) analysis and are given in kcal/mol. The cut-off of the solvent shell around the noble gas was chosen to be the maximum of the first peak in the corresponding radial distribution function, hence only considering the closest water molecules. The snapshots are at least 5 ps appart.

## 2.2 Ar-H<sub>2</sub>O dimers

|            | Snapshot        | 1       | 2       | 3       | 4       | 5       |
|------------|-----------------|---------|---------|---------|---------|---------|
| Fragment 1 | Total SAPT      | 0.4805  | -0.1243 | 0.5676  | -0.2262 | -0.0822 |
|            | Electrostatics  | -0.9105 | -0.3019 | -1.0082 | -0.2614 | -0.3426 |
|            | Exchange        | 3.4775  | 0.8798  | 2.9082  | 0.9889  | 1.0054  |
|            | Induction       | -0.6498 | -0.0610 | -0.1230 | -0.1527 | -0.0546 |
|            | Dispersion      | -1.4368 | -0.6412 | -1.2094 | -0.8010 | -0.6904 |
|            | Charge Transfer | -0.3383 | -0.0418 | -0.1295 | -0.0703 | -0.0438 |
| Fragment 2 | Total SAPT      | -0.2102 | -0.1635 | -0.1708 | -0.2717 |         |
|            | Electrostatics  | -0.2991 | -0.3328 | -0.3938 | -0.1969 |         |
|            | Exchange        | 0.9124  | 1.0081  | 1.2282  | 0.6081  |         |
|            | Induction       | -0.1158 | -0.1111 | -0.1347 | -0.0862 |         |
|            | Dispersion      | -0.7077 | -0.7277 | -0.8705 | -0.5967 |         |
|            | Charge Transfer | -0.0453 | -0.0495 | -0.0560 | -0.0325 |         |
| Fragment 3 | Total SAPT      |         |         | 0.1115  |         |         |
|            | Electrostatics  |         |         | -0.6167 |         |         |
|            | Exchange        |         |         | 1.9000  |         |         |
|            | Induction       |         |         | -0.1543 |         |         |
|            | Dispersion      |         |         | -1.0174 |         |         |
|            | Charge Transfer |         |         | -0.0881 |         |         |
| Fragment 4 | Total SAPT      |         |         | -0.1900 |         |         |
|            | Electrostatics  |         |         | -0.3060 |         |         |
|            | Exchange        |         |         | 0.9218  |         |         |
|            | Induction       |         |         | -0.1077 |         |         |
|            | Dispersion      |         |         | -0.6981 |         |         |
|            | Charge Transfer |         |         | -0.0462 |         |         |
| Average    | Total SAPT      | 0.1351  | -0.1439 | 0.0796  | -0.2489 | -0.0822 |
|            | Electrostatics  | -0.6048 | -0.3174 | -0.5812 | -0.2291 | -0.3426 |
|            | Exchange        | 2.1950  | 0.9439  | 1.7395  | 0.7985  | 1.0054  |
|            | Induction       | -0.3828 | -0.0861 | -0.1299 | -0.1195 | -0.0546 |
|            | Dispersion      | -1.0723 | -0.6844 | -0.9489 | -0.6988 | -0.6904 |
|            | Charge Transfer | -0.1918 | -0.0457 | -0.0800 | -0.0514 | -0.0438 |

Table 2: Pair-wise intermolecular interactions and their components of the Ar with an individual next-neighboring water molecule from the first solvent shell. The values were obtained by SAPT2+3(CCD) analysis and are given in kcal/mol. The cut-off of the solvent shell around the noble gas was chosen to be the maximum of the first peak in the corresponding radial distribution function, hence only considering the closest water molecules. The snapshots are at least 5 ps appart.

## 2.3 Kr-H<sub>2</sub>O dimers

|            | Snapshot        | 1       | 2       | 3       | 4       | 5       |
|------------|-----------------|---------|---------|---------|---------|---------|
| Fragment 1 | Total SAPT      | -0.1608 | 0.5086  | -0.2971 | -0.2191 | 0.5748  |
|            | Electrostatics  | -0.3661 | -1.2416 | 0.7010  | -0.3275 | -1.1422 |
|            | Exchange        | 1.0478  | 3.7036  | -0.2047 | 1.0059  | 3.3972  |
|            | Induction       | -0.1267 | -0.4591 | -0.1252 | -0.1431 | -0.2781 |
|            | Dispersion      | -0.7157 | -1.4944 | -0.6681 | -0.7543 | -1.4020 |
|            | Charge Transfer | -0.0541 | -0.2107 | -0.0402 | -0.0529 | -0.1931 |
| Fragment 2 | Total SAPT      | -0.3166 | -0.3077 | -0.1880 | -0.2079 | 0.0075  |
|            | Electrostatics  | -0.1684 | -0.2808 | -0.4711 | -0.2858 | -0.7601 |
|            | Exchange        | 0.5337  | 0.9050  | 1.3745  | 0.8175  | 2.2839  |
|            | Induction       | -0.0961 | -0.1639 | -0.2309 | -0.1128 | -0.3377 |
|            | Dispersion      | -0.5858 | -0.7680 | -0.8606 | -0.6268 | -1.1786 |
|            | Charge Transfer | -0.0254 | -0.0471 | -0.0739 | -0.0438 | -0.1100 |
| Fragment 3 | Total SAPT      | -0.1402 | -0.1899 | -0.0151 | -0.2522 |         |
|            | Electrostatics  | -0.3481 | -0.3254 | -0.5032 | -0.2504 |         |
|            | Exchange        | 0.9977  | 1.0563  | 1.4815  | 0.7306  |         |
|            | Induction       | -0.0923 | -0.1574 | -0.1114 | -0.1481 |         |
|            | Dispersion      | -0.6975 | -0.7634 | -0.8820 | -0.5843 |         |
|            | Charge Transfer | -0.0426 | -0.0634 | -0.0615 | -0.0465 |         |
| Fragment 4 | Total SAPT      | -0.3029 |         | -0.1000 | 0.1329  |         |
|            | Electrostatics  | -0.1972 |         | -0.4247 | -0.7151 |         |
|            | Exchange        | 0.5798  |         | 1.2641  | 2.0977  |         |
|            | Induction       | -0.1341 |         | -0.1123 | -0.1793 |         |
|            | Dispersion      | -0.5515 |         | -0.8271 | -1.0704 |         |
|            | Charge Transfer | -0.0376 |         | -0.0566 | -0.1057 |         |
| Fragment 5 | Total SAPT      | -0.1512 |         |         | 0.0778  |         |
|            | Electrostatics  | -0.5759 |         |         | -0.6195 |         |
|            | Exchange        | 1.0210  |         |         | 1.9614  |         |
|            | Induction       | -0.1131 |         |         | -0.2021 |         |
|            | Dispersion      | -0.6977 |         |         | -1.0620 |         |
|            | Charge Transfer | -0.0500 |         |         | -0.1054 |         |
| Fragment 6 | Total SAPT      | -0.1608 |         |         |         |         |
|            | Electrostatics  | -0.3661 |         |         |         |         |
|            | Exchange        | 1.0478  |         |         |         |         |
|            | Induction       | -0.1267 |         |         |         |         |
|            | Dispersion      | -0.7157 |         |         |         |         |
|            | Charge Transfer | -0.0541 |         |         |         |         |
| Average    | Total SAPT      | -0.2162 | 0.0036  | -0.1500 | -0.0937 | 0.2912  |
|            | Electrostatics  | -0.2892 | -0.6159 | -0.1745 | -0.3947 | -0.9512 |
|            | Exchange        | 0.8414  | 1.8883  | 0.9788  | 1.1629  | 2.8405  |
|            | Induction       | -0.1152 | -0.2601 | -0.1449 | -0.1458 | -0.3079 |
|            | Dispersion      | -0.6532 | -1.0086 | -0.8094 | -0.7589 | -1.2903 |
|            | Charge Transfer | -0.0428 | -0.1071 | -0.0581 | -0.0622 | -0.1516 |

Table 3: Pair-wise intermolecular interactions and their components of the Kr with an individual next-neighboring water molecule from the first solvent shell. The values were obtained by SAPT2+3(CCD) analysis and are given in kcal/mol. The cut-off of the solvent shell around the noble gas was chosen to be the maximum of the first peak in the corresponding radial distribution function, hence only considering the closest water molecules. The snapshots are at least 5 ps appart.
